# Supplementary material
Source: PubMed Central journal article supplement (PMC9474668)
Supplement: NIHMS1793519-supplement-Supplemental_Material.pdf [file NIHMS1793519-supplement-Supplemental_Material.pdf]

## 1 **Supplementary Note**

### 2 **1. The influence of sex on the transmission of inherited rare variants in families**

3 Linear regression analysis of trios controlling for cohort, sex and case status shows a  
4 negative correlation of DNMs and inhLoF (**Extended Data Fig. 3a**,  $P = 0.03$ ) and no  
5 significant gene by sex interaction. This result is consistent with a liability threshold  
6 model, with effects that are similar in males and females. These results are also  
7 consistent with familial and sporadic ASD having distinct etiologies (i.e. cases that carry  
8 damaging DNMs have less inhLoF risk and vice versa).

9 Based on the model of a female protective effect, we have proposed previously that the  
10 differential susceptibility of males and females could result in a bias in the transmission  
11 of genetic risk in ASD families<sup>8</sup>. Specifically, we hypothesized that inherited risk might  
12 show a biased transmission from the “protected” parent (mothers) to “susceptible”  
13 offspring (male cases). However, in this study we did not observe evidence that inhLoF  
14 variants were maternally biased, and we did not observe evidence of the predicted  
15 mother to son bias in the transmission of inhLoF variants (**Extended Data Fig. 1b**). We  
16 did observe a subtle trend of increased mother-to-daughter transmission, suggesting  
17 that there could be a maternal bias of inLoF variants when cases are female (and  
18 thus may have a greater transmitted genetic load). However, the difference was not  
19 statistically significant. Our results suggest that both fathers and mothers contribute  
20 substantially to inherited risk.

### 21 **2. Evaluation of PSs calculated using PRSice and SBayesR**

22 During peer review, we evaluated two polygenic scoring methods and, for the final  
23 analysis of the dataset, selected the polygenic scoring model with the best prediction  
24 accuracy. An initial analysis of our dataset was performed with polygenic scores  
25 calculated with PRSice<sup>24</sup>, a method that is commonly used in psychiatric genetic  
26 studies<sup>56</sup>. As suggested by reviewers, results were confirmed and strengthened using a  
27 newer method SBayesR<sup>20</sup>. Here we confirmed in our dataset that SBayesR improves  
28 the prediction accuracy of all polygenic scores (**Extended Data Fig. 1**). Overall results  
29 were consistent between both methods with one exception. Using PRSice, a sex

30 difference was observed in the liability threshold effect<sup>24</sup>, evident by the negative  
31 correlation of de novo/rare variants and polygenic scores, but with polygenic scores  
32 calculated using SBayesR, this sex difference was not statistically significant (**Extended**  
33 **Data Fig. 2**). We attribute this difference to an improved power for quantifying polygenic  
34 risk in females with SBayesR.

35
